# Supplementary material for: The survival, development, and reproduction of Gonipterus platensis (Coleoptera: Curculionidae) on the main Eucalyptus (Myrtaceae) genotypes planted in Brazil
Source: PeerJ. 2022 Aug 1;10:e13698. doi: 10.7717/peerj.13698 (PMC9351619; doi:10.7717/peerj.13698)
Supplement: Supplemental Information 1 — Parameters analyzed and described in the article. [file peerj-10-13698-s001.xls]

## Sheet: Larvae Survival
Rept	Treat	Time	Censure
1	UROP	15	1
2	UROP	15	1
3	UROP	15	1
4	UROP	16	0
5	UROP	15	1
6	UROP	21	1
7	UROP	16	1
8	UROP	16	1
9	UROP	14	0
10	UROP	16	1
11	UROP	13	1
12	UROP	18	1
13	UROP	15	1
14	UROP	15	1
15	UROP	14	1
16	UROP	18	1
17	UROP	14	1
18	UROP	15	1
19	UROP	21	1
20	UROP	15	1
21	UROP	17	1
22	UROP	16	1
23	UROP	16	1
24	UROP	16	1
25	UROP	14	1
26	UROP	14	1
27	UROP	16	1
28	UROP	17	1
29	UROP	15	1
30	UROP	17	1
31	UROP	17	1
32	UROP	14	1
33	UROP	18	1
34	UROP	16	1
35	UROP	13	1
36	UROP	16	1
37	UROP	16	1
38	UROP	20	1
39	UROP	14	1
40	UROP	13	1
41	UROP	17	1
42	UROP	17	1
43	UROP	18	1
44	UROP	14	1
45	UROP	14	1
46	UROP	14	1
47	UROP	15	1
48	UROP	15	1
49	UROP	13	1
50	UROP	9	0
51	UROP	14	1
52	UROP	14	1
53	UROP	15	1
54	UROP	18	1
55	UROP	15	1
56	UROP	14	1
57	UROP	14	1
58	UROP	13	1
59	UROP	14	1
60	UROP	16	1
61	UROP	15	1
62	UROP	17	1
63	UROP	16	1
64	UROP	14	1
65	UROP	15	1
66	UROP	17	1
67	UROP	16	1
68	UROP	16	1
69	UROP	14	0
70	UROP	17	1
71	UROP	15	1
72	UROP	18	1
73	UROP	15	1
74	UROP	16	0
75	UROP	16	1
76	UROP	18	1
77	UROP	17	1
78	UROP	18	1
79	UROP	19	1
80	UROP	18	1
81	UROP	15	1
82	UROP	19	1
83	UROP	14	1
84	UROP	16	1
85	UROP	17	1
86	UROP	14	1
87	UROP	15	1
88	UROP	15	1
89	UROP	16	1
90	UROP	17	1
91	UROP	16	1
92	UROP	15	1
93	UROP	16	1
94	UROP	16	1
95	UROP	15	1
96	UROP	15	1
97	UROP	13	1
98	UROP	13	1
99	UROP	16	1
100	UROP	18	1
1	Grandis	38	1
2	Grandis	51	0
3	Grandis	10	0
4	Grandis	5	0
5	Grandis	25	0
6	Grandis	38	1
7	Grandis	24	0
8	Grandis	55	0
9	Grandis	35	0
10	Grandis	41	0
11	Grandis	41	1
12	Grandis	47	0
13	Grandis	18	0
14	Grandis	8	0
15	Grandis	20	0
16	Grandis	37	0
17	Grandis	19	0
18	Grandis	33	1
19	Grandis	13	0
20	Grandis	30	1
21	Grandis	7	0
22	Grandis	41	0
23	Grandis	17	0
24	Grandis	11	0
25	Grandis	38	1
26	Grandis	17	0
27	Grandis	12	0
28	Grandis	41	1
29	Grandis	23	1
30	Grandis	8	1
31	Grandis	36	0
32	Grandis	46	0
33	Grandis	37	0
34	Grandis	8	0
35	Grandis	18	1
36	Grandis	34	1
37	Grandis	45	1
38	Grandis	7	0
39	Grandis	9	0
40	Grandis	10	0
41	Grandis	14	0
42	Grandis	18	0
43	Grandis	30	0
44	Grandis	12	0
45	Grandis	21	0
46	Grandis	13	0
47	Grandis	10	0
48	Grandis	10	0
49	Grandis	3	0
50	Grandis	7	0
51	Grandis	16	0
52	Grandis	19	0
53	Grandis	45	1
54	Grandis	40	1
55	Grandis	7	0
56	Grandis	3	0
57	Grandis	12	0
58	Grandis	26	0
59	Grandis	34	1
60	Grandis	8	0
61	Grandis	25	0
62	Grandis	34	1
63	Grandis	6	0
64	Grandis	32	0
65	Grandis	32	0
66	Grandis	8	0
67	Grandis	8	0
68	Grandis	9	0
69	Grandis	42	1
70	Grandis	51	0
71	Grandis	31	0
72	Grandis	17	0
73	Grandis	57	0
74	Grandis	32	0
75	Grandis	27	0
76	Grandis	16	0
77	Grandis	4	0
78	Grandis	16	0
79	Grandis	42	0
80	Grandis	41	1
81	Grandis	8	0
82	Grandis	42	1
83	Grandis	22	0
84	Grandis	38	1
85	Grandis	33	1
86	Grandis	38	1
87	Grandis	36	1
88	Grandis	16	0
89	Grandis	8	0
90	Grandis	21	0
91	Grandis	20	0
92	Grandis	11	0
93	Grandis	13	0
94	Grandis	32	1
95	Grandis	37	1
96	Grandis	36	0
97	Grandis	14	0
98	Grandis	36	0
99	Grandis	50	0
100	Grandis	38	1
1	CH - T	19	1
2	CH - T	20	1
3	CH - T	21	1
4	CH - T	21	1
5	CH - T	32	1
6	CH - T	21	1
7	CH - T	20	1
8	CH - T	22	1
9	CH - T	19	1
10	CH - T	25	1
11	CH - T	19	1
12	CH - T	17	1
13	CH - T	20	1
14	CH - T	24	1
15	CH - T	22	1
16	CH - T	16	1
17	CH - T	21	1
18	CH - T	29	1
19	CH - T	24	1
20	CH - T	16	0
21	CH - T	21	1
22	CH - T	21	1
23	CH - T	21	1
24	CH - T	24	1
25	CH - T	20	1
26	CH - T	26	1
27	CH - T	16	1
28	CH - T	24	1
29	CH - T	18	1
30	CH - T	25	1
31	CH - T	20	1
32	CH - T	23	0
33	CH - T	24	1
34	CH - T	24	0
35	CH - T	27	1
36	CH - T	10	0
37	CH - T	21	1
38	CH - T	24	1
39	CH - T	19	1
40	CH - T	25	1
41	CH - T	23	1
42	CH - T	24	1
43	CH - T	20	1
44	CH - T	20	1
45	CH - T	17	0
46	CH - T	20	1
47	CH - T	23	1
48	CH - T	19	0
49	CH - T	19	1
50	CH - T	19	1
51	CH - T	21	1
52	CH - T	20	1
53	CH - T	18	1
54	CH - T	19	1
55	CH - T	19	1
56	CH - T	8	0
57	CH - T	19	1
58	CH - T	23	1
59	CH - T	20	1
60	CH - T	18	1
61	CH - T	18	0
62	CH - T	19	1
63	CH - T	18	0
64	CH - T	21	1
65	CH - T	18	0
66	CH - T	4	0
67	CH - T	5	0
68	CH - T	19	1
69	CH - T	20	1
70	CH - T	19	1
71	CH - T	19	1
72	CH - T	19	1
73	CH - T	21	1
74	CH - T	5	0
75	CH - T	19	1
76	CH - T	21	1
77	CH - T	21	1
78	CH - T	19	1
79	CH - T	5	0
80	CH - T	19	1
81	CH - T	19	1
82	CH - T	23	1
83	CH - T	19	1
84	CH - T	22	1
85	CH - T	7	0
86	CH - T	28	1
87	CH - T	21	1
88	CH - T	18	0
89	CH - T	22	1
90	CH - T	22	1
91	CH - T	22	1
92	CH - T	21	1
93	CH - T	12	0
94	CH - T	13	0
95	CH - T	18	1
96	CH - T	19	1
97	CH - T	14	0
98	CH - T	5	0
99	CH - T	20	1
100	CH - T	22	0
1	VR - G	9	0
2	VR - G	17	1
3	VR - G	18	1
4	VR - G	10	0
5	VR - G	21	1
6	VR - G	20	1
7	VR - G	12	0
8	VR - G	18	0
9	VR - G	22	1
10	VR - G	19	1
11	VR - G	26	1
12	VR - G	28	1
13	VR - G	17	0
14	VR - G	15	0
15	VR - G	23	1
16	VR - G	33	0
17	VR - G	24	1
18	VR - G	22	1
19	VR - G	19	1
20	VR - G	20	1
21	VR - G	33	0
22	VR - G	21	1
23	VR - G	23	0
24	VR - G	22	1
25	VR - G	18	0
26	VR - G	22	1
27	VR - G	22	1
28	VR - G	23	1
29	VR - G	19	1
30	VR - G	19	1
31	VR - G	21	1
32	VR - G	20	1
33	VR - G	18	1
34	VR - G	17	1
35	VR - G	21	1
36	VR - G	23	1
37	VR - G	20	1
38	VR - G	22	1
39	VR - G	10	1
40	VR - G	21	1
41	VR - G	24	1
42	VR - G	22	1
43	VR - G	18	1
44	VR - G	20	1
45	VR - G	22	1
46	VR - G	23	1
47	VR - G	25	1
48	VR - G	22	1
49	VR - G	18	1
50	VR - G	26	1
51	VR - G	22	1
52	VR - G	12	0
53	VR - G	22	1
54	VR - G	28	1
55	VR - G	23	1
56	VR - G	20	1
57	VR - G	19	1
58	VR - G	21	0
59	VR - G	21	1
60	VR - G	17	0
61	VR - G	23	1
62	VR - G	19	1
63	VR - G	22	1
64	VR - G	19	1
65	VR - G	20	1
66	VR - G	23	1
67	VR - G	23	1
68	VR - G	12	0
69	VR - G	22	1
70	VR - G	15	0
71	VR - G	20	0
72	VR - G	19	1
73	VR - G	18	0
74	VR - G	12	0
75	VR - G	17	0
76	VR - G	27	1
77	VR - G	21	1
78	VR - G	27	1
79	VR - G	21	1
80	VR - G	21	1
81	VR - G	26	1
82	VR - G	10	0
83	VR - G	12	0
84	VR - G	19	1
85	VR - G	20	0
86	VR - G	23	0
87	VR - G	23	1
88	VR - G	21	1
89	VR - G	21	1
90	VR - G	21	1
91	VR - G	17	1
92	VR - G	19	1
93	VR - G	25	1
94	VR - G	19	1
95	VR - G	23	1
96	VR - G	23	1
97	VR - G	16	0
98	VR - G	25	1
99	VR - G	18	1
100	VR - G	17	1
1	CAMAL	14	1
2	CAMAL	23	1
3	CAMAL	19	1
4	CAMAL	17	1
5	CAMAL	19	1
6	CAMAL	17	1
7	CAMAL	17	1
8	CAMAL	20	1
9	CAMAL	17	0
10	CAMAL	20	1
11	CAMAL	20	1
12	CAMAL	11	0
13	CAMAL	17	1
14	CAMAL	21	1
15	CAMAL	16	1
16	CAMAL	16	1
17	CAMAL	23	1
18	CAMAL	20	1
19	CAMAL	18	1
20	CAMAL	17	1
21	CAMAL	20	1
22	CAMAL	20	1
23	CAMAL	6	0
24	CAMAL	17	1
25	CAMAL	16	0
26	CAMAL	21	1
27	CAMAL	18	1
28	CAMAL	18	1
29	CAMAL	20	0
30	CAMAL	18	1
31	CAMAL	22	1
32	CAMAL	17	1
33	CAMAL	12	0
34	CAMAL	18	1
35	CAMAL	10	0
36	CAMAL	21	1
37	CAMAL	6	0
38	CAMAL	19	1
39	CAMAL	19	1
40	CAMAL	16	1
41	CAMAL	18	1
42	CAMAL	18	1
43	CAMAL	20	1
44	CAMAL	15	1
45	CAMAL	9	0
46	CAMAL	19	1
47	CAMAL	16	1
48	CAMAL	18	1
49	CAMAL	18	1
50	CAMAL	19	1
51	CAMAL	18	1
52	CAMAL	18	1
53	CAMAL	23	1
54	CAMAL	16	1
55	CAMAL	13	0
56	CAMAL	18	1
57	CAMAL	16	1
58	CAMAL	17	1
59	CAMAL	17	1
60	CAMAL	7	0
61	CAMAL	17	1
62	CAMAL	2	0
63	CAMAL	17	1
64	CAMAL	17	1
65	CAMAL	6	0
66	CAMAL	17	1
67	CAMAL	20	1
68	CAMAL	15	1
69	CAMAL	18	1
70	CAMAL	15	1
71	CAMAL	16	1
72	CAMAL	12	0
73	CAMAL	19	1
74	CAMAL	18	0
75	CAMAL	18	1
76	CAMAL	10	0
77	CAMAL	7	0
78	CAMAL	21	0
79	CAMAL	19	1
80	CAMAL	21	1
81	CAMAL	20	0
82	CAMAL	19	1
83	CAMAL	15	1
84	CAMAL	13	0
85	CAMAL	16	1
86	CAMAL	14	0
87	CAMAL	18	1
88	CAMAL	7	0
89	CAMAL	20	1
90	CAMAL	16	1
91	CAMAL	16	1
92	CAMAL	14	1
93	CAMAL	14	1
94	CAMAL	16	1
95	CAMAL	16	1
96	CAMAL	16	1
97	CAMAL	24	1
98	CAMAL	17	1
99	CAMAL	18	1
100	CAMAL	16	1

## Sheet: Larvae-Adult Survival
Repet	Treat	Time	Censure
1	UROP	45	1
2	UROP	49	1
3	UROP	48	1
4	UROP	16	0
5	UROP	50	1
6	UROP	49	1
7	UROP	44	1
8	UROP	16	0
9	UROP	14	0
10	UROP	59	1
11	UROP	13	1
12	UROP	46	1
13	UROP	45	1
14	UROP	47	1
15	UROP	42	1
16	UROP	45	1
17	UROP	14	0
18	UROP	15	0
19	UROP	21	0
20	UROP	45	1
21	UROP	45	1
22	UROP	46	1
23	UROP	45	1
24	UROP	47	1
25	UROP	48	1
26	UROP	47	1
27	UROP	47	1
28	UROP	52	1
29	UROP	45	1
30	UROP	17	0
31	UROP	45	1
32	UROP	49	1
33	UROP	18	0
34	UROP	43	1
35	UROP	44	1
36	UROP	45	1
37	UROP	47	1
38	UROP	49	1
39	UROP	14	0
40	UROP	44	1
41	UROP	44	1
42	UROP	17	0
43	UROP	57	1
44	UROP	50	1
45	UROP	47	1
46	UROP	60	1
47	UROP	15	0
48	UROP	46	1
49	UROP	40	1
50	UROP	9	0
51	UROP	14	0
52	UROP	14	0
53	UROP	45	1
54	UROP	18	0
55	UROP	46	1
56	UROP	45	1
57	UROP	43	1
58	UROP	43	1
59	UROP	14	0
60	UROP	44	1
61	UROP	44	1
62	UROP	17	0
63	UROP	44	1
64	UROP	43	1
65	UROP	45	1
66	UROP	17	0
67	UROP	16	0
68	UROP	55	1
69	UROP	14	0
70	UROP	47	1
71	UROP	15	0
72	UROP	53	1
73	UROP	15	0
74	UROP	16	0
75	UROP	45	1
76	UROP	18	0
77	UROP	48	1
78	UROP	48	1
79	UROP	54	1
80	UROP	52	1
81	UROP	15	0
82	UROP	53	1
83	UROP	14	0
84	UROP	43	1
85	UROP	51	1
86	UROP	43	1
87	UROP	47	1
88	UROP	15	0
89	UROP	16	0
90	UROP	46	1
91	UROP	53	1
92	UROP	46	1
93	UROP	45	1
94	UROP	16	0
95	UROP	46	1
96	UROP	15	0
97	UROP	46	1
98	UROP	47	1
99	UROP	16	0
100	UROP	50	1
1	Grandis	71	1
2	Grandis	51	0
3	Grandis	10	0
4	Grandis	5	0
5	Grandis	25	0
6	Grandis	68	1
7	Grandis	24	0
8	Grandis	55	0
9	Grandis	35	0
10	Grandis	41	0
11	Grandis	75	1
12	Grandis	47	0
13	Grandis	18	0
14	Grandis	8	0
15	Grandis	20	0
16	Grandis	37	0
17	Grandis	19	0
18	Grandis	68	1
19	Grandis	13	0
20	Grandis	66	1
21	Grandis	7	0
22	Grandis	41	0
23	Grandis	17	0
24	Grandis	11	0
25	Grandis	38	0
26	Grandis	17	0
27	Grandis	12	0
28	Grandis	41	0
29	Grandis	23	0
30	Grandis	8	0
31	Grandis	36	0
32	Grandis	46	0
33	Grandis	37	0
34	Grandis	8	0
35	Grandis	18	0
36	Grandis	69	1
37	Grandis	45	0
38	Grandis	7	0
39	Grandis	9	0
40	Grandis	10	0
41	Grandis	14	0
42	Grandis	18	0
43	Grandis	30	0
44	Grandis	12	0
45	Grandis	21	0
46	Grandis	13	0
47	Grandis	10	0
48	Grandis	10	0
49	Grandis	3	0
50	Grandis	7	0
51	Grandis	16	0
52	Grandis	19	0
53	Grandis	45	0
54	Grandis	40	0
55	Grandis	7	0
56	Grandis	3	0
57	Grandis	12	0
58	Grandis	26	0
59	Grandis	68	1
60	Grandis	8	0
61	Grandis	25	0
62	Grandis	82	1
63	Grandis	6	0
64	Grandis	32	0
65	Grandis	32	0
66	Grandis	8	0
67	Grandis	8	0
68	Grandis	9	0
69	Grandis	42	0
70	Grandis	51	0
71	Grandis	31	0
72	Grandis	17	0
73	Grandis	57	0
74	Grandis	32	0
75	Grandis	27	0
76	Grandis	16	0
77	Grandis	4	0
78	Grandis	89	0
79	Grandis	42	0
80	Grandis	41	0
81	Grandis	8	0
82	Grandis	91	1
83	Grandis	22	0
84	Grandis	38	0
85	Grandis	33	0
86	Grandis	38	0
87	Grandis	36	0
88	Grandis	16	0
89	Grandis	8	0
90	Grandis	21	0
91	Grandis	20	0
92	Grandis	11	0
93	Grandis	13	0
94	Grandis	75	1
95	Grandis	74	1
96	Grandis	36	0
97	Grandis	14	0
98	Grandis	36	0
99	Grandis	50	0
100	Grandis	75	1
1	CH - T	54	1
2	CH - T	59	1
3	CH - T	59	1
4	CH - T	54	1
5	CH - T	67	1
6	CH - T	59	1
7	CH - T	61	1
8	CH - T	54	1
9	CH - T	55	1
10	CH - T	59	1
11	CH - T	54	1
12	CH - T	50	1
13	CH - T	57	1
14	CH - T	57	1
15	CH - T	22	0
16	CH - T	53	1
17	CH - T	58	1
18	CH - T	76	1
19	CH - T	57	1
20	CH - T	16	0
21	CH - T	54	1
22	CH - T	54	1
23	CH - T	59	1
24	CH - T	59	1
25	CH - T	52	1
26	CH - T	60	1
27	CH - T	26	0
28	CH - T	24	0
29	CH - T	49	1
30	CH - T	59	1
31	CH - T	20	0
32	CH - T	23	0
33	CH - T	63	1
34	CH - T	24	0
35	CH - T	27	0
36	CH - T	10	0
37	CH - T	57	1
38	CH - T	24	0
39	CH - T	57	1
40	CH - T	19	0
41	CH - T	58	1
42	CH - T	59	1
43	CH - T	55	1
44	CH - T	51	1
45	CH - T	17	0
46	CH - T	20	0
47	CH - T	58	1
48	CH - T	19	0
49	CH - T	54	1
50	CH - T	19	0
51	CH - T	59	1
52	CH - T	54	1
53	CH - T	51	1
54	CH - T	54	1
55	CH - T	52	1
56	CH - T	8	0
57	CH - T	19	0
58	CH - T	72	1
59	CH - T	52	1
60	CH - T	49	1
61	CH - T	18	0
62	CH - T	54	1
63	CH - T	18	0
64	CH - T	58	1
65	CH - T	18	0
66	CH - T	4	0
67	CH - T	5	0
68	CH - T	19	0
69	CH - T	54	1
70	CH - T	58	1
71	CH - T	19	0
72	CH - T	19	0
73	CH - T	19	0
74	CH - T	21	0
75	CH - T	5	0
76	CH - T	21	0
77	CH - T	54	1
78	CH - T	61	1
79	CH - T	5	0
80	CH - T	55	1
81	CH - T	19	0
82	CH - T	23	0
83	CH - T	52	1
84	CH - T	54	1
85	CH - T	7	0
86	CH - T	54	1
87	CH - T	55	1
88	CH - T	18	0
89	CH - T	54	1
90	CH - T	22	0
91	CH - T	49	1
92	CH - T	57	1
93	CH - T	12	0
94	CH - T	13	0
95	CH - T	18	0
96	CH - T	19	0
97	CH - T	14	0
98	CH - T	5	0
99	CH - T	52	1
100	CH - T	22	0
1	VR - G	9	0
2	VR - G	50	1
3	VR - G	50	1
4	VR - G	10	0
5	VR - G	55	1
6	VR - G	56	1
7	VR - G	12	0
8	VR - G	18	0
9	VR - G	22	0
10	VR - G	51	1
11	VR - G	26	0
12	VR - G	28	0
13	VR - G	17	0
14	VR - G	15	0
15	VR - G	55	1
16	VR - G	33	0
17	VR - G	54	1
18	VR - G	54	1
19	VR - G	19	0
20	VR - G	53	1
21	VR - G	33	0
22	VR - G	53	1
23	VR - G	23	0
24	VR - G	53	1
25	VR - G	18	0
26	VR - G	22	0
27	VR - G	53	1
28	VR - G	50	1
29	VR - G	59	1
30	VR - G	52	1
31	VR - G	21	0
32	VR - G	52	1
33	VR - G	51	1
34	VR - G	55	1
35	VR - G	21	0
36	VR - G	58	1
37	VR - G	50	1
38	VR - G	22	0
39	VR - G	10	0
40	VR - G	52	1
41	VR - G	58	1
42	VR - G	57	1
43	VR - G	52	1
44	VR - G	20	0
45	VR - G	22	0
46	VR - G	64	1
47	VR - G	25	0
48	VR - G	53	1
49	VR - G	54	1
50	VR - G	64	1
51	VR - G	22	0
52	VR - G	12	0
53	VR - G	53	1
54	VR - G	62	1
55	VR - G	54	1
56	VR - G	56	1
57	VR - G	51	1
58	VR - G	21	0
59	VR - G	53	1
60	VR - G	17	0
61	VR - G	23	0
62	VR - G	19	0
63	VR - G	22	0
64	VR - G	50	1
65	VR - G	50	1
66	VR - G	57	1
67	VR - G	23	0
68	VR - G	12	0
69	VR - G	22	0
70	VR - G	15	0
71	VR - G	20	0
72	VR - G	19	0
73	VR - G	18	0
74	VR - G	12	0
75	VR - G	17	0
76	VR - G	27	0
77	VR - G	50	1
78	VR - G	63	1
79	VR - G	21	0
80	VR - G	51	1
81	VR - G	64	1
82	VR - G	10	0
83	VR - G	12	0
84	VR - G	19	0
85	VR - G	20	0
86	VR - G	23	0
87	VR - G	54	1
88	VR - G	53	1
89	VR - G	55	1
90	VR - G	21	0
91	VR - G	57	1
92	VR - G	19	0
93	VR - G	25	0
94	VR - G	51	1
95	VR - G	59	1
96	VR - G	69	1
97	VR - G	16	0
98	VR - G	56	1
99	VR - G	18	0
100	VR - G	53	1
1	CAMAL	14	0
2	CAMAL	23	0
3	CAMAL	19	0
4	CAMAL	17	0
5	CAMAL	19	0
6	CAMAL	17	0
7	CAMAL	53	1
8	CAMAL	50	1
9	CAMAL	17	0
10	CAMAL	20	0
11	CAMAL	20	0
12	CAMAL	11	0
13	CAMAL	54	1
14	CAMAL	21	0
15	CAMAL	16	0
16	CAMAL	53	1
17	CAMAL	23	0
18	CAMAL	20	0
19	CAMAL	50	1
20	CAMAL	17	0
21	CAMAL	20	0
22	CAMAL	20	0
23	CAMAL	6	0
24	CAMAL	17	0
25	CAMAL	16	0
26	CAMAL	21	0
27	CAMAL	49	1
28	CAMAL	18	0
29	CAMAL	20	0
30	CAMAL	18	0
31	CAMAL	22	0
32	CAMAL	50	1
33	CAMAL	12	0
34	CAMAL	18	0
35	CAMAL	10	0
36	CAMAL	55	1
37	CAMAL	6	0
38	CAMAL	19	0
39	CAMAL	51	1
40	CAMAL	48	1
41	CAMAL	18	0
42	CAMAL	51	1
43	CAMAL	20	0
44	CAMAL	47	1
45	CAMAL	9	0
46	CAMAL	51	1
47	CAMAL	48	1
48	CAMAL	18	0
49	CAMAL	52	1
50	CAMAL	19	0
51	CAMAL	18	0
52	CAMAL	18	0
53	CAMAL	23	0
54	CAMAL	50	1
55	CAMAL	13	0
56	CAMAL	18	0
57	CAMAL	47	1
58	CAMAL	17	0
59	CAMAL	17	0
60	CAMAL	7	0
61	CAMAL	47	1
62	CAMAL	2	0
63	CAMAL	17	0
64	CAMAL	17	0
65	CAMAL	6	0
66	CAMAL	17	0
67	CAMAL	20	0
68	CAMAL	49	1
69	CAMAL	18	0
70	CAMAL	47	1
71	CAMAL	48	1
72	CAMAL	12	0
73	CAMAL	19	0
74	CAMAL	18	0
75	CAMAL	18	0
76	CAMAL	10	0
77	CAMAL	7	0
78	CAMAL	21	0
79	CAMAL	53	1
80	CAMAL	50	1
81	CAMAL	20	0
82	CAMAL	52	1
83	CAMAL	15	0
84	CAMAL	13	0
85	CAMAL	16	0
86	CAMAL	14	0
87	CAMAL	18	0
88	CAMAL	7	0
89	CAMAL	53	1
90	CAMAL	47	1
91	CAMAL	16	0
92	CAMAL	14	0
93	CAMAL	14	0
94	CAMAL	16	0
95	CAMAL	16	0
96	CAMAL	48	1
97	CAMAL	24	0
98	CAMAL	17	0
99	CAMAL	18	0
100	CAMAL	16	0

## Sheet: Development
					Larva-Adult Survival		Complete lifespan
Treatment	Repet	Larva period	Pupal period	Sex	Day	Censure	Day	Censure
E. camaldulensis	1	14	-		14	0	14	0
E. camaldulensis	2	23	-		23	0	23	0
E. camaldulensis	3	19	-		19	0	19	0
E. camaldulensis	4	17	-		17	0	17	0
E. camaldulensis	5	19	-		19	0	19	0
E. camaldulensis	6	17	-		17	0	17	0
E. camaldulensis	7	17	36	M	53	1	170	1
E. camaldulensis	8	20	30	M	50	1	82	1
E. camaldulensis	9	-	-		17	0	17	0
E. camaldulensis	10	20	-		20	0	20	0
E. camaldulensis	11	20	-		20	0	20	0
E. camaldulensis	12	-	-		11	0	11	0
E. camaldulensis	13	17	37	M	54	1	69	1
E. camaldulensis	14	21	-		21	0	21	0
E. camaldulensis	15	16	-		16	0	16	0
E. camaldulensis	16	16	37	F	53	1	108	1
E. camaldulensis	17	23	-		23	0	23	0
E. camaldulensis	18	20	-		20	0	20	0
E. camaldulensis	19	18	32	M	50	1	64	1
E. camaldulensis	20	17	-		17	0	17	0
E. camaldulensis	21	20	-		20	0	20	0
E. camaldulensis	22	20	-		20	0	20	0
E. camaldulensis	23	-	-		6	0	6	0
E. camaldulensis	24	17	-		17	0	17	0
E. camaldulensis	25	-	-		16	0	16	0
E. camaldulensis	26	21	-		21	0	21	0
E. camaldulensis	27	18	31		49	1	49	1
E. camaldulensis	28	18	-		18	0	18	0
E. camaldulensis	29	-	-		20	0	20	0
E. camaldulensis	30	18	-		18	0	18	0
E. camaldulensis	31	22	-		22	0	22	0
E. camaldulensis	32	17	33	M	50	1	72	1
E. camaldulensis	33	-	-		12	0	12	0
E. camaldulensis	34	18	-		18	0	18	0
E. camaldulensis	35	-	-		10	0	10	0
E. camaldulensis	36	21	34	M	55	1	66	1
E. camaldulensis	37	-	-		6	0	6	0
E. camaldulensis	38	19	-		19	0	19	0
E. camaldulensis	39	19	32	M	51	1	168	1
E. camaldulensis	40	16	32		48	1	165	1
E. camaldulensis	41	18	-		18	0	18	0
E. camaldulensis	42	18	33	M	51	1	113	1
E. camaldulensis	43	20	-		20	0	20	0
E. camaldulensis	44	15	32	M	47	1	127	1
E. camaldulensis	45	-	-		9	0	9	0
E. camaldulensis	46	19	32	F	51	1	168	1
E. camaldulensis	47	16	32	F	48	1	48	1
E. camaldulensis	48	18	-		18	0	18	0
E. camaldulensis	49	18	34	M	52	1	169	1
E. camaldulensis	50	19	-		19	0	19	0
E. camaldulensis	51	18	-		18	0	18	0
E. camaldulensis	52	18	-		18	0	18	0
E. camaldulensis	53	23	-		23	0	23	0
E. camaldulensis	54	16	34	M	50	1	166	1
E. camaldulensis	55	-	-		13	0	13	0
E. camaldulensis	56	18	-		18	0	18	0
E. camaldulensis	57	16	31	M	47	1	165	1
E. camaldulensis	58	17	-		17	0	17	0
E. camaldulensis	59	17	-		17	0	17	0
E. camaldulensis	60	-	-		7	0	7	0
E. camaldulensis	61	17	30	F	47	1	169	1
E. camaldulensis	62	-	-		2	0	2	0
E. camaldulensis	63	17	-		17	0	17	0
E. camaldulensis	64	17	-		17	0	17	0
E. camaldulensis	65	-	-		6	0	6	0
E. camaldulensis	66	17	-		17	0	17	0
E. camaldulensis	67	20	-		20	0	20	0
E. camaldulensis	68	16	33	F	49	1	170	1
E. camaldulensis	69	18	-		18	0	18	0
E. camaldulensis	70	15	32	M	47	1	48	1
E. camaldulensis	71	16	32	F	48	1	152	1
E. camaldulensis	72	-	-		12	0	12	0
E. camaldulensis	73	19	-		19	0	19	0
E. camaldulensis	74	-	-		18	0	18	0
E. camaldulensis	75	18	-		18	0	18	0
E. camaldulensis	76	-	-		10	0	10	0
E. camaldulensis	77	-	-		7	0	7	0
E. camaldulensis	78	-	-		21	0	21	0
E. camaldulensis	79	19	34	M	53	1	131	1
E. camaldulensis	80	21	29	M	50	1	134	1
E. camaldulensis	81	-	-		20	0	20	0
E. camaldulensis	82	19	33	M	52	1	94	1
E. camaldulensis	83	15	-		15	0	15	0
E. camaldulensis	84	-	-		13	0	13	0
E. camaldulensis	85	16	-		16	0	16	0
E. camaldulensis	86	-	-		14	0	14	0
E. camaldulensis	87	18	-		18	0	18	0
E. camaldulensis	88	-	-		7	0	7	0
E. camaldulensis	89	20	33	M	53	1	98	1
E. camaldulensis	90	16	31	M	47	1	131	1
E. camaldulensis	91	16	-		16	0	16	0
E. camaldulensis	92	14	-		14	0	14	0
E. camaldulensis	93	14	-		14	0	14	0
E. camaldulensis	94	16	-		16	0	16	0
E. camaldulensis	95	16	-		16	0	16	0
E. camaldulensis	96	16	32	M	48	1	138	1
E. camaldulensis	97	24	-		24	0	24	0
E. camaldulensis	98	17	-		17	0	17	0
E. camaldulensis	99	18	-		18	0	18	0
E. camaldulensis	100	16	-		16	0	16	0
E. grandis	1	38	45	F	71	1	124	1
E. grandis	2	-	-		51	0	51	0
E. grandis	3	-	-		10	0	10	0
E. grandis	4	-	-		5	0	5	0
E. grandis	5	-	-		25	0	25	0
E. grandis	6	38	33	M	68	1	79	1
E. grandis	7	-	-		24	0	24	0
E. grandis	8	-	-		55	0	55	0
E. grandis	9	-	-		35	0	35	0
E. grandis	10	-	-		41	0	41	0
E. grandis	11	41	34	M	75	1	222	1
E. grandis	12	-	-		47	0	47	0
E. grandis	13	-	-		18	0	18	0
E. grandis	14	-	-		8	0	8	0
E. grandis	15	-	-		20	0	20	0
E. grandis	16	-	-		37	0	37	0
E. grandis	17	-	-		19	0	19	0
E. grandis	18	33	35	M	68	1	75	1
E. grandis	19	-	-		13	0	13	0
E. grandis	20	30	36	M	66	1	236	1
E. grandis	21	-	-		7	0	7	0
E. grandis	22	-	-		41	0	41	0
E. grandis	23	-	-		17	0	17	0
E. grandis	24	-	-		11	0	11	0
E. grandis	25	38	-		38	0	38	0
E. grandis	26	-	-		17	0	17	0
E. grandis	27	-	-		12	0	12	0
E. grandis	28	41	-		41	0	41	0
E. grandis	29	-	-		23	0	23	0
E. grandis	30	-	-		8	0	8	0
E. grandis	31	36	-		36	0	36	0
E. grandis	32	-	-		46	0	46	0
E. grandis	33	-	-		37	0	37	0
E. grandis	34	-	-		8	0	8	0
E. grandis	35	-	-		18	0	18	0
E. grandis	36	34	35	M	69	1	176	1
E. grandis	37	45	-		45	0	45	0
E. grandis	38	-	-		7	0	7	0
E. grandis	39	-	-		9	0	9	0
E. grandis	40	-	-		10	0	10	0
E. grandis	41	-	-		14	0	14	0
E. grandis	42	-	-		18	0	18	0
E. grandis	43	-	-		30	0	30	0
E. grandis	44	-	-		12	0	12	0
E. grandis	45	-	-		21	0	21	0
E. grandis	46	-	-		13	0	13	0
E. grandis	47	-	-		10	0	10	0
E. grandis	48	-	-		10	0	10	0
E. grandis	49	-	-		3	0	3	0
E. grandis	50	-	-		7	0	7	0
E. grandis	51	-	-		16	0	16	0
E. grandis	52	-	-		19	0	19	0
E. grandis	53	45	-		45	0	45	0
E. grandis	54	40	-		40	0	40	0
E. grandis	55	-	-		7	0	7	0
E. grandis	56	-	-		3	0	3	0
E. grandis	57	-	-		12	0	12	0
E. grandis	58	-	-		26	0	26	0
E. grandis	59	34	34	M	68	1	111	1
E. grandis	60	-	-		8	0	8	0
E. grandis	61	-	-		25	0	25	0
E. grandis	62	34	48	M	82	1	200	1
E. grandis	63	-	-		6	0	6	0
E. grandis	64	-	-		32	0	32	0
E. grandis	65	-	-		32	0	32	0
E. grandis	66	-	-		8	0	8	0
E. grandis	67	-	-		8	0	8	0
E. grandis	68	-	-		9	0	9	0
E. grandis	69	42	-		42	0	42	0
E. grandis	70	-	-		51	0	51	0
E. grandis	71	-	-		31	0	31	0
E. grandis	72	-	-		17	0	17	0
E. grandis	73	-	-		57	0	57	0
E. grandis	74	-	-		32	0	32	0
E. grandis	75	-	-		27	0	27	0
E. grandis	76	-	-		16	0	16	0
E. grandis	77	-	-		4	0	4	0
E. grandis	78	-	-		89	0	89	0
E. grandis	79	-	-		42	0	42	0
E. grandis	80	41	-		41	0	41	0
E. grandis	81	-	-		8	0	8	0
E. grandis	82	42	49	M	91	1	137	1
E. grandis	83	-	-		22	0	22	0
E. grandis	84	38	-		38	0	38	0
E. grandis	85	33	-		33	0	33	0
E. grandis	86	38	-		38	0	38	0
E. grandis	87	36	-		36	0	36	0
E. grandis	88	-	-		16	0	16	0
E. grandis	89	-	-		8	0	8	0
E. grandis	90	-	-		21	0	21	0
E. grandis	91	-	-		20	0	20	0
E. grandis	92	-	-		11	0	11	0
E. grandis	93	-	-		13	0	13	0
E. grandis	94	32	43	F	75	1	100	1
E. grandis	95	37	37	M	74	1	82	1
E. grandis	96	-	-		36	0	36	0
E. grandis	97	-	-		14	0	14	0
E. grandis	98	-	-		36	0	36	0
E. grandis	99	-	-		50	0	50	0
E. grandis	100	38	37	M	75	1	83	1
VR3748	1	-	-		9	0	9	0
VR3748	2	17	33	M	50	1	206	1
VR3748	3	18	32	M	50	1	182	1
VR3748	4	-	-		10	0	10	0
VR3748	5	21	34	M	55	1	184	1
VR3748	6	20	36	F	56	1	513	1
VR3748	7	-	-		12	0	12	0
VR3748	8	-	-		18	0	18	0
VR3748	9	22	-		22	0	22	0
VR3748	10	19	32	M	51	1	183	1
VR3748	11	26	-		26	0	26	0
VR3748	12	28	-		28	0	28	0
VR3748	13	-	-		17	0	17	0
VR3748	14	-	-		15	0	15	0
VR3748	15	23	32	F	55	1	181	1
VR3748	16	-	-		33	0	33	0
VR3748	17	24	30	M	54	1	269	1
VR3748	18	22	32	M	54	1	265	1
VR3748	19	19	-		19	0	19	0
VR3748	20	20	33	M	53	1	306	1
VR3748	21	-	-		33	0	33	0
VR3748	22	21	32	M	53	1	241	1
VR3748	23	-	-		23	0	23	0
VR3748	24	22	31	F	53	1	277	1
VR3748	25	-	-		18	0	18	0
VR3748	26	22	-		22	0	22	0
VR3748	27	22	31	M	53	1	183	1
VR3748	28	23	27	F	50	1	186	1
VR3748	29	19	40	M	59	1	245	1
VR3748	30	19	33	M	52	1	192	1
VR3748	31	21	-		21	0	21	0
VR3748	32	20	32	M	52	1	285	1
VR3748	33	18	33	M	51	1	139	1
VR3748	34	17	38	M	55	1	94	1
VR3748	35	21	-		21	0	21	0
VR3748	36	23	35	M	58	1	180	1
VR3748	37	20	30	M	50	1	206	1
VR3748	38	22	-		22	0	22	0
VR3748	39	10	-		10	0	10	0
VR3748	40	21	31	M	52	1	241	1
VR3748	41	24	34	M	58	1	180	1
VR3748	42	22	35	F	57	1	395	1
VR3748	43	18	34	M	52	1	262	1
VR3748	44	20	-		20	0	20	0
VR3748	45	22	-		22	0	22	0
VR3748	46	23	41	M	64	1	183	1
VR3748	47	25	-		25	0	25	0
VR3748	48	22	31	M	53	1	499	1
VR3748	49	18	36	F	54	1	359	1
VR3748	50	26	38	M	64	1	178	1
VR3748	51	22	-		22	0	22	0
VR3748	52	-	-		12	0	12	0
VR3748	53	22	-	M	53	1	211	1
VR3748	54	28	34	M	62	1	98	1
VR3748	55	23	31	M	54	1	187	1
VR3748	56	20	36	F	56	1	585	1
VR3748	57	19	32	M	51	1	264	1
VR3748	58	-	-		21	0	21	0
VR3748	59	21	32	M	53	1	147	1
VR3748	60	-	-		17	0	17	0
VR3748	61	23	-		23	0	23	0
VR3748	62	19	-		19	0	19	0
VR3748	63	22	-		22	0	22	0
VR3748	64	19	31	M	50	1	206	1
VR3748	65	20	30	M	50	1	182	1
VR3748	66	23	34	M	57	1	190	1
VR3748	67	23	-		23	0	23	0
VR3748	68	-	-		12	0	12	0
VR3748	69	22	-		22	0	22	0
VR3748	70	-	-		15	0	15	0
VR3748	71	-	-		20	0	20	0
VR3748	72	19	-		19	0	19	0
VR3748	73	-	-		18	0	18	0
VR3748	74	-	-		12	0	12	0
VR3748	75	-	-		17	0	17	0
VR3748	76	27	-		27	0	27	0
VR3748	77	21	29	F	50	1	219	1
VR3748	78	27	36	M	63	1	180	1
VR3748	79	21	-		21	0	21	0
VR3748	80	21	30	M	51	1	209	1
VR3748	81	26	38	M	64	1	180	1
VR3748	82	-	-		10	0	10	0
VR3748	83	-	-		12	0	12	0
VR3748	84	19	-		19	0	19	0
VR3748	85	-	-		20	0	20	0
VR3748	86	-	-		23	0	23	0
VR3748	87	23	31	M	54	1	187	1
VR3748	88	21	32	F	53	1	209	1
VR3748	89	21	34	M	55	1	82	1
VR3748	90	21	-		21	0	21	0
VR3748	91	17	40	F	57	1	261	1
VR3748	92	19	-		19	0	19	0
VR3748	93	25	-		25	0	25	0
VR3748	94	19	32	M	51	1	127	1
VR3748	95	23	36	F	59	1	143	1
VR3748	96	23	46		69	1	299	1
VR3748	97	-	-		16	0	16	0
VR3748	98	25	31	M	56	1	189	1
VR3748	99	18	-		18	0	18	0
VR3748	100	17	36	M	53	1	139	1
H13	1	19	35	F	54	1	316	1
H13	2	20	39	F	59	1	218	1
H13	3	21	38	M	59	1	216	1
H13	4	21	33	M	54	1	216	1
H13	5	32	35	M	67	1	177	1
H13	6	21	38	F	59	1	262	1
H13	7	20	41	F	61	1	186	1
H13	8	22	32	F	54	1	305	1
H13	9	19	36	M	55	1	245	1
H13	10	25	34	M	59	1	252	1
H13	11	19	35	M	54	1	225	1
H13	12	17	33	M	50	1	336	1
H13	13	20	37	M	57	1	222	1
H13	14	24	33	M	57	1	219	1
H13	15	22	-		22	0	22	0
H13	16	16	37	M	53	1	148	1
H13	17	21	37	F	58	1	219	1
H13	18	29	47	M	76	1	82	1
H13	19	24	33	F	57	1	323	1
H13	20	-	-		16	0	16	0
H13	21	21	33	F	54	1	179	1
H13	22	21	33	M	54	1	193	1
H13	23	21	38	M	59	1	176	1
H13	24	24	35	M	59	1	63	1
H13	25	20	32	M	52	1	144	1
H13	26	26	34	M	60	1	223	1
H13	27	16	-		26	0	16	0
H13	28	24	-		24	0	24	0
H13	29	18	31	M	49	1	133	1
H13	30	25	34	M	59	1	324	1
H13	31	20	-		20	0	20	0
H13	32	-	-		23	0	23	0
H13	33	24	39	M	63	1	143	1
H13	34	-	-		24	0	24	0
H13	35	27	-		27	0	27	0
H13	36	-	-		10	0	10	0
H13	37	21	36	F	57	1	148	1
H13	38	24	-		24	0	24	0
H13	39	19	38	M	57	1	141	1
H13	40	25	-		19	0	25	1
H13	41	23	35	M	58	1	257	1
H13	42	24	35	M	59	1	137	1
H13	43	20	35	M	55	1	207	1
H13	44	20	31	M	51	1	164	1
H13	45	-	-		17	0	17	0
H13	46	20	-		20	0	20	0
H13	47	23	35	M	58	1	234	1
H13	48	-	-		19	0	19	0
H13	49	19	35	M	54	1	138	1
H13	50	19	-		19	0	19	0
H13	51	21	38	M	59	1	198	1
H13	52	20	34	M	54	1	138	1
H13	53	18	33	M	51	1	138	1
H13	54	19	35	F	54	1	208	1
H13	55	19	33	F	52	1	115	1
H13	56	-	-		8	0	8	0
H13	57	19	-		19	0	19	0
H13	58	23	49	M	72	1	175	1
H13	59	20	32	F	52	1	258	1
H13	60	18	31	M	49	1	193	1
H13	61	-	-		18	0	18	0
H13	62	19	35	M	54	1	58	1
H13	63	-	43		18	0	18	0
H13	64	21	37	M	58	1	133	1
H13	65	-	34	F	18	0	18	0
H13	66	-	-		4	0	4	0
H13	67	-	-		5	0	5	0
H13	68	19	-		19	0	19	0
H13	69	20	34	M	54	1	183	1
H13	70	19	39	F	58	1	427	1
H13	71	19	-		19	0	19	0
H13	72	19	-		19	0	19	0
H13	73	21	-		19	0	21	0
H13	74	-	-		21	0	5	0
H13	75	19	-		5	0	19	0
H13	76	21	-		21	0	21	0
H13	77	21	33	M	54	1	213	1
H13	78	19	42	M	61	1	80	1
H13	79	5	-		5	0	5	0
H13	80	19	36	F	55	1	393	1
H13	81	19	-		19	0	19	0
H13	82	23	-		23	0	23	0
H13	83	19	33	F	52	1	251	1
H13	84	22	32	M	54	1	80	1
H13	85	-	-		7	0	7	0
H13	86	28	33	F	54	1	213	1
H13	87	21	34	M	55	1	183	1
H13	88	-	-		18	0	18	0
H13	89	22	32	M	54	1	406	1
H13	90	22	-		22	0	22	0
H13	91	22	27	M	49	1	135	1
H13	92	21	36	M	57	1	202	1
H13	93	-	-		12	0	12	0
H13	94	-	-		13	0	13	0
H13	95	18	-		18	0	18	0
H13	96	19	-		19	0	19	0
H13	97	-	-		14	0	14	0
H13	98	-	-		5	0	5	0
H13	99	20	32	M	52	1	196	1
H13	100	-	-		22	0	22	0
E. urophylla	1	16	29	F	45	1	289	1
E. urophylla	2	15	34	M	49	1	181	1
E. urophylla	3	15	33	M	48	1	180	1
E. urophylla	4	-	-		16	0	16	0
E. urophylla	5	15	35	M	50	1	182	1
E. urophylla	6	21	28	M	49	1	178	1
E. urophylla	7	16	28	F	44	1	326	1
E. urophylla	8	16	-		16	0	16	0
E. urophylla	9	-	-		14	0	14	0
E. urophylla	10	16	43	M	59	1	172	1
E. urophylla	11	13	-		13	1	13	0
E. urophylla	12	18	28	M	46	1	222	1
E. urophylla	13	15	30	M	45	1	176	1
E. urophylla	14	15	32	M	47	1	185	1
E. urophylla	15	14	28	M	42	1	184	1
E. urophylla	16	18	27	M	45	1	175	1
E. urophylla	17	14	-		14	0	14	0
E. urophylla	18	15	-		15	0	15	0
E. urophylla	19	21	-		21	0	21	0
E. urophylla	20	15	30	F	45	1	419	1
E. urophylla	21	17	28	F	45	1	174	1
E. urophylla	22	16	30	F	46	1	280	1
E. urophylla	23	16	29	F	45	1	457	1
E. urophylla	24	16	31	F	47	1	280	1
E. urophylla	25	14	34		48	1	229	1
E. urophylla	26	14	33	F	47	1	282	1
E. urophylla	27	16	31	M	47	1	190	1
E. urophylla	28	17	35	M	52	1	231	1
E. urophylla	29	15	30	F	45	1	253	1
E. urophylla	30	17	-		17	0	17	0
E. urophylla	31	17	28	M	45	1	197	1
E. urophylla	32	14	35	F	49	1	325	1
E. urophylla	33	18	-		18	0	18	0
E. urophylla	34	16	27	F	43	1	241	1
E. urophylla	35	13	31	F	44	1	558	1
E. urophylla	36	16	29	F	45	1	380	1
E. urophylla	37	16	31	F	47	1	350	1
E. urophylla	38	20	29	M	49	1	67	1
E. urophylla	39	14	-		14	0	14	0
E. urophylla	40	13	31	M	44	1	222	1
E. urophylla	41	17	27	F	44	1	361	1
E. urophylla	42	17	-		17	0	17	0
E. urophylla	43	18	39	F	57	1	292	1
E. urophylla	44	14	36	M	50	1	218	1
E. urophylla	45	14	33		47	1	280	1
E. urophylla	46	14	46	M	60	1	212	1
E. urophylla	47	15	-		15	0	15	0
E. urophylla	48	15	31	F	46	1	462	1
E. urophylla	49	13	27	F	40	1	281	1
E. urophylla	50	9	-		9	0	9	0
E. urophylla	51	14	-		14	0	14	0
E. urophylla	52	14	-		14	0	14	0
E. urophylla	53	15	30	F	45	1	250	1
E. urophylla	54	18	-		18	0	18	0
E. urophylla	55	15	31	M	46	1	354	1
E. urophylla	56	14	31	M	45	1	223	1
E. urophylla	57	14	29	F	43	1	306	1
E. urophylla	58	13	30	F	43	1	197	1
E. urophylla	59	14	-		14	0	14	0
E. urophylla	60	16	28	F	44	1	353	1
E. urophylla	61	15	29	M	44	1	333	1
E. urophylla	62	17	-		17	0	17	0
E. urophylla	63	16	28	M	44	1	175	1
E. urophylla	64	14	29	M	43	1	210	1
E. urophylla	65	15	30	F	45	1	338	1
E. urophylla	66	17	-		17	0	17	0
E. urophylla	67	16	-		16	0	16	0
E. urophylla	68	16	39	F	55	1	495	1
E. urophylla	69	-	-		14	0	14	0
E. urophylla	70	17	30	M	47	1	221	1
E. urophylla	71	15	-		15	0	15	0
E. urophylla	72	18	35	M	53	1	170	1
E. urophylla	73	15	-		15	0	15	0
E. urophylla	74	-	-		16	0	16	0
E. urophylla	75	16	29	M	45	1	212	1
E. urophylla	76	18	-		18	0	18	0
E. urophylla	77	17	31	M	48	1	189	1
E. urophylla	78	18	30	F	48	1	371	1
E. urophylla	79	19	35	F	54	1	266	1
E. urophylla	80	18	34		52	1	226	1
E. urophylla	81	15	-		15	0	15	0
E. urophylla	82	19	34	M	53	1	348	1
E. urophylla	83	14	-		14	0	14	0
E. urophylla	84	16	27	F	43	1	432	1
E. urophylla	85	17	-	M	51	1	250	1
E. urophylla	86	14	29		43	1	282	1
E. urophylla	87	15	32		47	1	258	1
E. urophylla	88	15	-		15	0	15	0
E. urophylla	89	16	-		16	0	16	0
E. urophylla	90	17	29	M	46	1	277	1
E. urophylla	91	16	37	M	53	1	237	1
E. urophylla	92	15	31	F	46	1	385	1
E. urophylla	93	16	29	M	45	1	207	1
E. urophylla	94	16	-		16	0	16	0
E. urophylla	95	15	31	M	46	1	410	1
E. urophylla	96	15	-		15	0	15	0
E. urophylla	97	13	33	F	46	1	220	1
E. urophylla	98	13	34	F	47	1	253	1
E. urophylla	99	16	-		16	0	16	0
E. urophylla	100	18	32	M	50	1	296	1

## Sheet: Reproduction
Treatment	Rep (couples)	pre-oviposition period	egg capsule/female	egg capsule/day	larvae/egg capsule	larvae/female	incubation period
camal	1	55	4	1.33333	1.33333	4	7.33333
VR3748	1	34	109	1.39744	3.8125	305	7.05882
VR3748	2	24	183	1.66364	2.65686	271	7.80412
VR3748	3	36	92	1.87755	3.39024	139	7.05
VR3748	4	34	187	1.496	3.39394	336	7.02885
VR3748	5	30	50	1.6129	2.6875	43	7.17647
VR3748	6	24	136	1.34653	3.75385	244	7.20548
VR3748	7	27	167	1.34677	2.81356	166	7.24194
VR3748	8	30	153	1.35398	2.48077	129	6.96875
VR3748	9	29	383	1.86829	3.38298	477	7.10169
VR3748	10	33	63	1.5	3.53061	173	7.44186
CH13	1	33	19	1.1875	1.85714	13	7.14286
CH13	2	42	32	1.28	2.3	23	7.18182
CH13	3	33	53	1.29268	3.6	108	7.42424
CH13	4	31	25	1.47059	2.5	50	7.16667
CH13	5	39	76	1.20635	2.13043	49	7.28
CH13	6	28	47	1.51613	2.73333	41	7.44444
CH13	7	36	28	1.4	2.11765	36	7.09091
CH13	8	31	67	1.34	3.82143	107	7.17949
CH13	9	34	11	1.1	4	12	7.2
CH13	10	31	38	1.22581	2.625	21	7.75
CH13	11	33	11	1.22222	2	12	6.33333
CH13	12	27	28	1.75	1.8	18	6.9
urophylla	1	29	85	1.63462	2.83019	150	7.1791
urophylla	2	29	129	1.57317	4.45455	332	7.2314
urophylla	3	34	204	1.38776	4.37755	429	7.14062
urophylla	4	28	145	1.66667	4.16071	233	7.03797
urophylla	5	32	91	2.16667	3.02857	106	7.15556
urophylla	6	24	93	1.43077	2.51429	88	7.36735
urophylla	7	29	53	1.325	2.8	56	7.13043
urophylla	8	32	271	1.49724	3.23457	524	7.23721
urophylla	9	27	68	1.47826	4.13953	178	7.19672
urophylla	10	24	37	1.48	3.73684	71	7.43478
urophylla	11	24	65	1.44444	3.30303	109	7.37778
urophylla	12	20	126	1.61538	3.51389	253	7.25
urophylla	13	27	80	1.70213	2.58333	62	7.40741
urophylla	14	32	61	1.84848	3.56818	157	7.39623
urophylla	15	28	44	1.375	3.2	96	7.1
urophylla	16	37	67	1.45652	2.95122	121	7.21154
urophylla	17	28	44	1.51724	3	69	7.2069
urophylla	18	33	101	1.68333	3.17308	165	7.43939
